# Supplementary material for: Acute Hypoxia Stress-Induced Apoptosis in Gill of Japanese Flounder (Paralichthys olivaceus) by Modulating the Epas1/Bad Pathway
Source: MDPI journal article supplement (doi:10.3390/biology11111656), 2022-11-12
Supplement: s1 [file s1]

## Supplementary Materials

Table S1 Primers used for q-PCR.

| Primers      | Sequences (5'-3')       | Annealing temperature (°C) | Product size (bp) | Accession number                               |
|--------------|-------------------------|----------------------------|-------------------|------------------------------------------------|
| <i>Bad</i>   | F:TCGGAGGAGATAGAGGAAGC  | 60°C                       | 156 bp            | XM_020095653.1<br>(accessed on 28 August 2022) |
|              | R:TCGTGAGACAGTGGAGGCGT  |                            |                   |                                                |
| <i>EPAS1</i> | F:ATGAGTGGCACAACCAGAAG  | 60°C                       | 131 bp            | XM_020096630.1<br>(accessed on 28 August 2022) |
|              | R:AGACAGGAGGGCTCGAACGAG |                            |                   |                                                |
| 18S          | F:ATTGACGGAAGGGCACCAC   | 60°C                       | 134 bp            | EF126037.1                                     |
|              | R:ATGCACCACCACCCACAGA   |                            |                   |                                                |

Table S2 System used for q-PCR.

| Component                                                | Volume  |
|----------------------------------------------------------|---------|
| 2 × ChamQ SYBR Color qPCR Master Mix (High ROX Premixed) | 10.0 µl |
| Forward Primer                                           | 0.4 µl  |
| Reverse Primer                                           | 0.4 µl  |
| cDNA                                                     | 2.0 µl  |
| ddH <sub>2</sub> O                                       | 7.2 µl  |

\*The RNA concentration of the samples was 500ng/ul, and the concentration of cDNA obtained by reverse transcription of RNA was 1000ng/ul.

Table S3 Procedure used for q-PCR.

| Stage   | Repeat  | Temperature | Time   |
|---------|---------|-------------|--------|
| Stage 1 | Rep: 1  | 95 °C       | 30 sec |
| Stage 2 | Rep: 40 | 95 °C       | 10 sec |
|         |         | 60 °C       | 30 sec |
| Stage 3 | Rep: 1  | 95 °C       | 15 sec |
|         |         | 60 °C       | 60 sec |
|         |         | 95 °C       | 15 sec |

Table S4 System and procedure used for double digestion.

| Component                                          | Volume          |
|----------------------------------------------------|-----------------|
| Restriction Enzyme (KpnI / HindIII / BamHI / XhoI) | 1.0 $\mu$ l     |
| DNA                                                | 1.0 $\mu$ g     |
| 10X NEBuffer                                       | 5 $\mu$ l       |
| ddH <sub>2</sub> O                                 | To 50.0 $\mu$ l |
| Incubation Time                                    | 3 hours         |
| Incubation Temperature                             | 37°C            |

Table S5 Primers of plasmid construction for dual-luciferase reporter assay.

| Primers             | Sequences (5'-3')                                                    | Annealing temperature (°C) | Product size (bp) | Accession number                               |
|---------------------|----------------------------------------------------------------------|----------------------------|-------------------|------------------------------------------------|
| pc3.1~ <i>EPAS1</i> | F:cttggtaccgagctcggtaccCGTGCAGAGGAGGAAACAT                           | 54°C                       | 2982 bp           | XM_020096630.1<br>(accessed on 28 August 2022) |
|                     | R:aacggggccctctagactcgagACACCAAAAGACCCGAGTT                          |                            |                   |                                                |
| pGL~ <i>Bad</i>     | F:atttctctatcgataggtaccACGGTGGTTTTATGGCTTA                           | 51°C                       | 2013 bp           | 109634873                                      |
|                     | R:cagtaccggaatgccaagcttGGCTTGACTTTTCTGTGTG                           |                            |                   |                                                |
| pGL~Bf1             | F:atttctctatcgataggtaccCGTCAGTGTATGAAAGGCT                           | 52°C                       | 1790 bp           | 109634873                                      |
|                     | R:cagtaccggaatgccaagcttGGCTTGACTTTTCTGTGTG                           |                            |                   |                                                |
| pGL~Bf2             | F:atttctctatcgataggtaccTCAGGGGATGAGAAACACT                           | 52°C                       | 1404 bp           | 109634873                                      |
|                     | R:cagtaccggaatgccaagcttGGCTTGACTTTTCTGTGTG                           |                            |                   |                                                |
| pGL~Bf3             | F:atttctctatcgataggtaccGGGCCTTAAAAAGCCTGAA                           | 52°C                       | 830 bp            | 109634873                                      |
|                     | R:cagtaccggaatgccaagcttGGCTTGACTTTTCTGTGTG                           |                            |                   |                                                |
| pGL~Bf4             | F:atttctctatcgataggtaccGCCTCACCCCTACAAAAAA                           | 52°C                       | 679 bp            | 109634873                                      |
|                     | R:cagtaccggaatgccaagcttGGCTTGACTTTTCTGTGTG                           |                            |                   |                                                |
| pGL~Bf5             | F:atttctctatcgataggtaccACGAGGTAGGTGTTCCTC                            | 52°C                       | 529 bp            | 109634873                                      |
|                     | R:cagtaccggaatgccaagcttGGCTTGACTTTTCTGTGTG                           |                            |                   |                                                |
| pGL~Bmp3            | F:TAAGTGCTTG GTTGAAACTGGCTGAATAAATCG                                 | 53°C                       | 2004 bp           | 109634873                                      |
|                     | R:GTTTCAACCAAGCACTTATAAATTAGATGAATAA<br>TATTA AAAATATTATAATCATT CAGG |                            |                   |                                                |
| pGL~Bm3             | F:TAAGTGCTTG GTTGAAACTGGCTGAATAAATCG                                 | 53°C                       | 821 bp            | 109634873                                      |
|                     | R:GTTTCAACCAAGCACTTATAAATTAGATGAATAA<br>TATTA AAAATATTATAATCATT CAGG |                            |                   |                                                |
| pGL~Bmp5            | F:TTCTTCATCTTTGATTCATTAATGGCAAGATGTAA<br>CAAAG                       | 53°C                       | 2001 bp           | 109634873                                      |
|                     | R:TGAATCAAAGATGAAGAACAACCTACCTCGT                                    |                            |                   |                                                |
| pGL~Bm5             | F:TTCTTCATCTTTGATTCATTAATGGCAAGATGTAA<br>CAAAG                       | 53°C                       | 517 bp            | 109634873                                      |
|                     | R:TGAATCAAAGATGAAGAACAACCTACCTCGT                                    |                            |                   |                                                |

Table S6 System used for dual-luciferase reporter assay.

| Component                                 | Volume  |
|-------------------------------------------|---------|
| 2 × Phanta Max Master Mix (Dye Plus)      | 25.0 µl |
| Forward Primer                            | 2.0 µl  |
| Reverse Primer                            | 2.0 µl  |
| cDNA ( <i>EPAS1</i> ) / DNA( <i>Bad</i> ) | 1.0 µl  |
| ddH <sub>2</sub> O                        | 20.0 µl |

Table S7 Procedure used for dual-luciferase reporter assay.

| Stage   | Repeat  | Temperature | Time           |
|---------|---------|-------------|----------------|
| Stage 1 | Rep: 1  | 95 °C       | 3 min          |
| Stage 2 | Rep: 30 | 95 °C       | 15 sec         |
|         |         | 60 °C*      | 15 sec         |
|         |         | 72 °C       | 30 - 60 sec/kb |
| Stage 3 | Rep: 1  | 72 °C       | 5 min          |

\*Set annealing temperature according to melting temperature (T<sub>m</sub>) value of primer.

Table S8 Primers of methylation status detecting in *EPAS1* and *Bad* promoter by MS-PCR.

| Primers          | Sequences (5'-3')                | Annealing temperature (°C) | Product size (bp) | Accession number |
|------------------|----------------------------------|----------------------------|-------------------|------------------|
| <i>EPAS1</i> - M | F:ATTTTATAATGTAAGAAAAGTTGGTTGTGT | 50°C                       | 193bp             | 109635465        |
|                  | R:TTAAATCATTTCAAAAACAAATCTC      |                            |                   |                  |
| <i>Bad</i> -M    | F:ATAGAAAAGTTAAGTTTGATTTGTGA     | 48.8°C                     | 400bp             | 109634873        |
|                  | R:ACTAAAAAACAACAAAAAAGCTTCCTA    |                            |                   |                  |

Table S9 The accession numbers of Bad protein.

| Species                                             | Accession numbers |
|-----------------------------------------------------|-------------------|
| human ( <i>Homo sapiens</i> )                       | NP_004313.1       |
| goat ( <i>Capra hircus</i> )                        | XP_017898279.1    |
| pig ( <i>Sus scrofa</i> )                           | XP_020938542.1    |
| Green sea turtle ( <i>Chelonia mydas</i> )          | XP_007072774.3    |
| tropical clawed frog ( <i>Xenopus tropicalis</i> )  | XP_031756504.1    |
| large yellow croaker ( <i>Larimichthys crocea</i> ) | XP_010741574.1    |
| Atlantic salmon ( <i>Salmo salar</i> )              | XP_014051932.1    |
| Japanese medaka ( <i>Oryzias latipes</i> )          | XP_011485704.1    |
| Nile tilapia ( <i>Oreochromis niloticus</i> )       | XP_003452465.1    |
| climbing perch ( <i>Anabas testudineus</i> )        | XP_026208848.1    |
| Japanese flounder ( <i>Paralichthys olivaceus</i> ) | XP_019951212.1    |

Table S10 The accession numbers of EPAS1 protein.

| Species                                             | Accession numbers |
|-----------------------------------------------------|-------------------|
| Nile tilapia ( <i>Oreochromis niloticus</i> )       | XP_003438301.1    |
| Japanese medaka ( <i>Oryzias latipes</i> )          | XP_023819367.1    |
| large yellow croaker ( <i>Larimichthys crocea</i> ) | XP_019116438.1    |
| ballan wrasse ( <i>Labrus bergylta</i> )            | XP_020511317.1    |
| turbot ( <i>Scophthalmus maximus</i> )              | XP_035461545.2    |
| Japanese flounder ( <i>Paralichthys olivaceus</i> ) | XP_019952189.1    |
| tongue sole ( <i>Cynoglossus semilaevis</i> )       | XP_008320789.1    |
| zebrafish ( <i>Danio rerio</i> )                    | XP_695262.6       |
| goldfish ( <i>Carassius auratus</i> )               | XP_026132160.1    |
| chicken ( <i>Gallus gallus</i> )                    | XP_046794384.1    |
| Green sea turtle ( <i>Chelonia mydas</i> )          | XP_043399726.1    |
| human ( <i>Homo sapiens</i> )                       | XP_011531000.1    |

Figure S1 The melt curves of primers for three genes *EPAS1* (A), *Bad* (B), 18S (C) in qPCR.

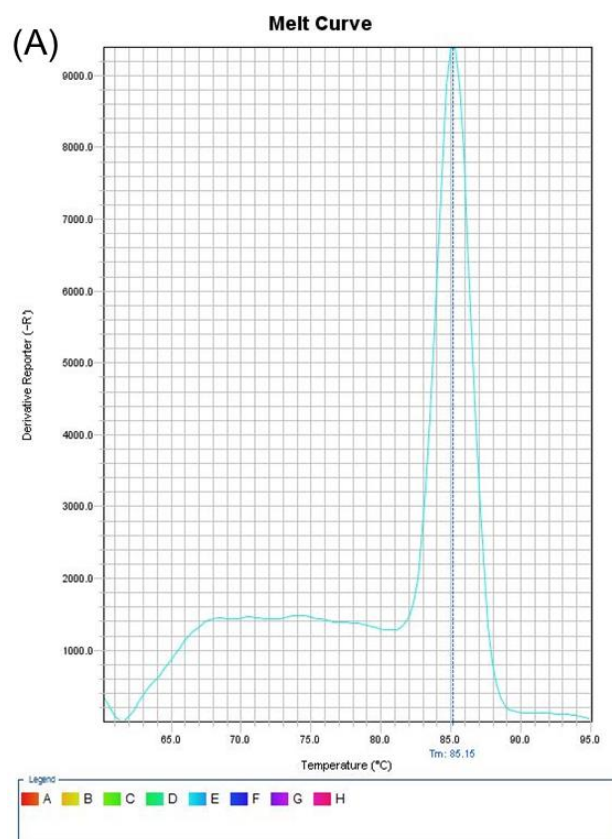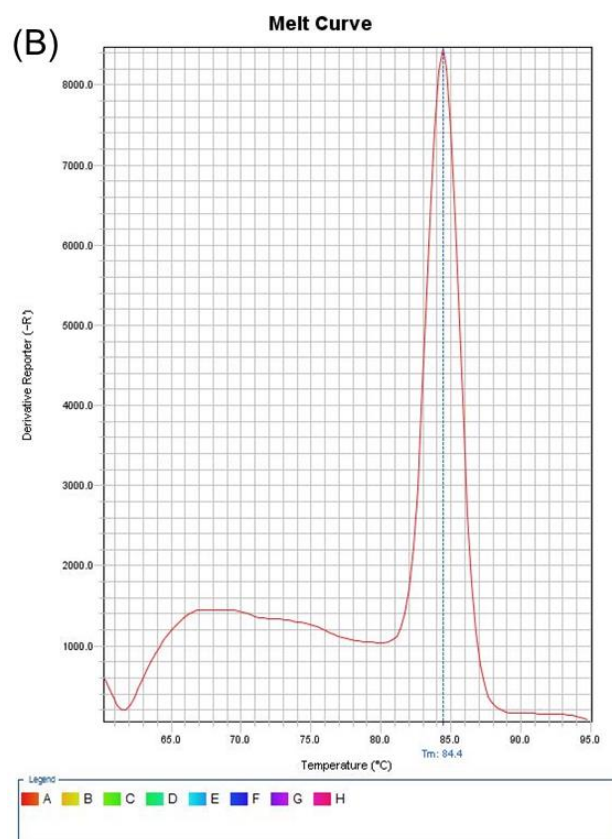

(C)

Melt Curve

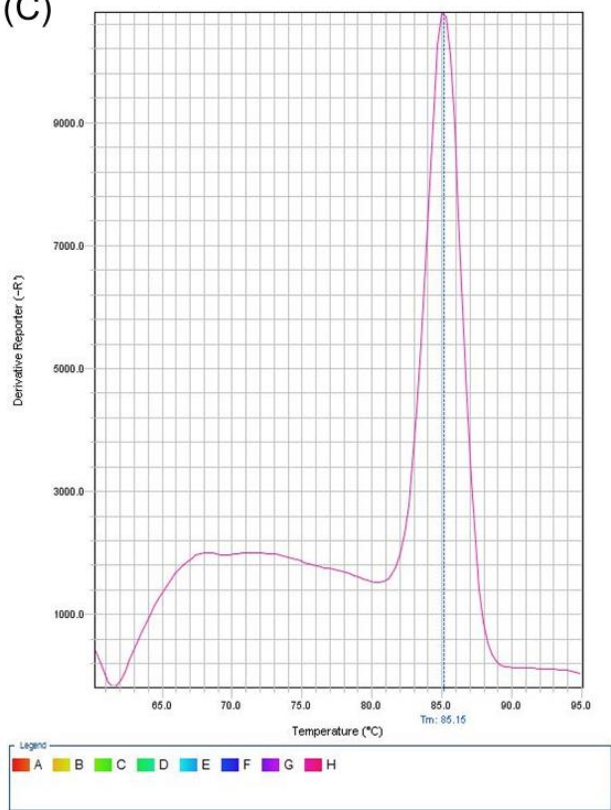



Figure S2 The predicted binding site of EPAS1 on the *Bad* promoter.

-2013  
 ACGGTGGTTTTATGGCTTAAGTTGGTGCATACATGGCTTGACTTTG**CCACACACACACGCACGCACACACA**GA  
 TTAATAATGGATAATAATTGCATGGTTCTCAAACATGCATCCAAATCCAACCAAAAGGAGAACTCCAGTGTATT  
 ATCTCTATAATCCCTCCATAAATACAGTTCAAAAGAAGCAACTCTCAACAATGATCTTCAAGAGCTGCTTCAT  
 GCATACGTCAGTGTATGAAAGGCTGACTGTGCAAACCTTTGCACTACATGTTAGTCTAAGCTTAGAAACTCACA  
 TTTGTTCCATTTGGATGCACTGAATTAGAAAAAGCCCTTTGACATTGAATACATCACAGCATTGTTTCAATGA  
 CTGACTTTGCCAAATTAATTCAGTTTATTTCTAGTGTCTAATATAATAGGGGGAGAGAGCAGAATGACATTGG  
 GGAGGTGAAGAACAGGCTCTGGATTAAAAATGTTAGATAATTACATGGCTGAGTCTCCTGTGTTGACGTGAG  
 GAAAGTGCAAGAGAGCAAAGCAAAGCACATACCCATACAGTGCTGCTTACTGTAACGGTTCTGTATAAAGA  
 -1432 **Binding site 2**  
**AGAGGAATG**TAACCCATTAATCAGCTTTTCAGGGGATGAGAAACACTTTTTTCTGATGATGTCACAATGCAAT  
 TTTTCATGCCTGACACTATGACACGTTTTTGCAGCAATAATGCTACTAGAGTAATCAACTGCAATTGAAAGACA  
 TTCAAAATAAGCTATTTGCTCGTATTGTTTCCAAGAAAGCTCACAACTGTGACAGGAGGTAGGAGATGAGG  
 CAGTGCGACCAAAGATAAACACTCAGTAAAACACACACACAAGTGAATCAGTTTGTAGTCTACCTCCCCAC  
 CTGCTGCTCATGCGAGGTATGACAGCTAACAAACAGCCTGGAGGATTTTCTGTCTTCCATGTGTCCAGCCATA  
 GGGTCCCAGCACTAGAGAAAGCAGAGAAGATAAAAGAAGAGCTTAACCTTAAGACCTTCGAGGAACTGAAT  
 GTTAATGTGATTCCTCCTCGATATGAATCAATTAATAAATAAAGTTTACCGGATGATTATTACATGTCATGTAAT  
 GACAAGAGCAAATCTCACATAAACATTTATCACAGAAACATTATCATAGTGGGGGGGAA**-866 Binding site 3**  
**GAGTGGAAACGGA**  
 CTTCCAAAGGCCCAAAGGGGAGGGGGGCCTTAAAAAGCCTGAATGATTATAATATTTTTAATATTATTCATCT  
 AATTTATAAGTGCTT**-766 Binding site 4**  
**AATGGAAAC**GGTTGAAACTGGCTGAATAAATCGACTGATTGACTGAAATTTATATCTA  
 AAAATCGTAGAGGCACCCTGAGGTACCTGCCTCACCCCTACAAAAAACGGTTTAGTCGAA**-646 Binding site 5**  
**GTGACTGACT**  
 GACTACTGGAGAAGTGGTGTTCAGCATGTCAAGAAAGCAAACGGAAAGTCTGGGAATCAGAAAAATAAAAAA  
 TATAAAAAATAAATACTAGTTAGTTAGTTGGTTCTTACGAGGTAGGTGTTCTTCATCT**-507 Binding site 6**  
**TCTGTGTGTCAG**TTTG  
 ATTCATTAATGGCAAGATGTAACAAAGTGAGAGATTACACCCCATTTATAAATGAATACTTAATGGGAGGAA  
 AGCTGTATTTTAAAAATGACTTAGGGGGTTAGAAAATAAGATGGTATTTTTAAGGTTTGTTTTATACTTGAG  
 AAATAATAAAGTAACTGTAGGTAAAAGTCTGAGAAAGGAGGACAGAAATGCAGCGAGATTTTCATATTGTGC  
 ATAATTAAGCATATCAGATCATTATTACTTATACCAGATGTGGTATGTACTGTTTATTAGTGAGACATGGGGG  
 CCCACAGATACTGCTTGTGTATAGGGCCCAGAATCTTGTGCTACGCCCCCTGGTGGTGAGTAGATAATGAGTG  
 AATGTTTCATGTTTTGGGTGAATTATCCCTTCAATTTGCAGTTGAGTGAATTTGGCTTCACTTTTGGGGATCTGT  
 CATATTTATATATCAATCATTATATCAATTCTACCACACACAGAAAAGTCAAGCC<sup>-1</sup>

The bases under the blue shadow are the predicted binding site sequence.

Figure S3 Methylation status of *EPAS1* promoter and *Bad* promoter.

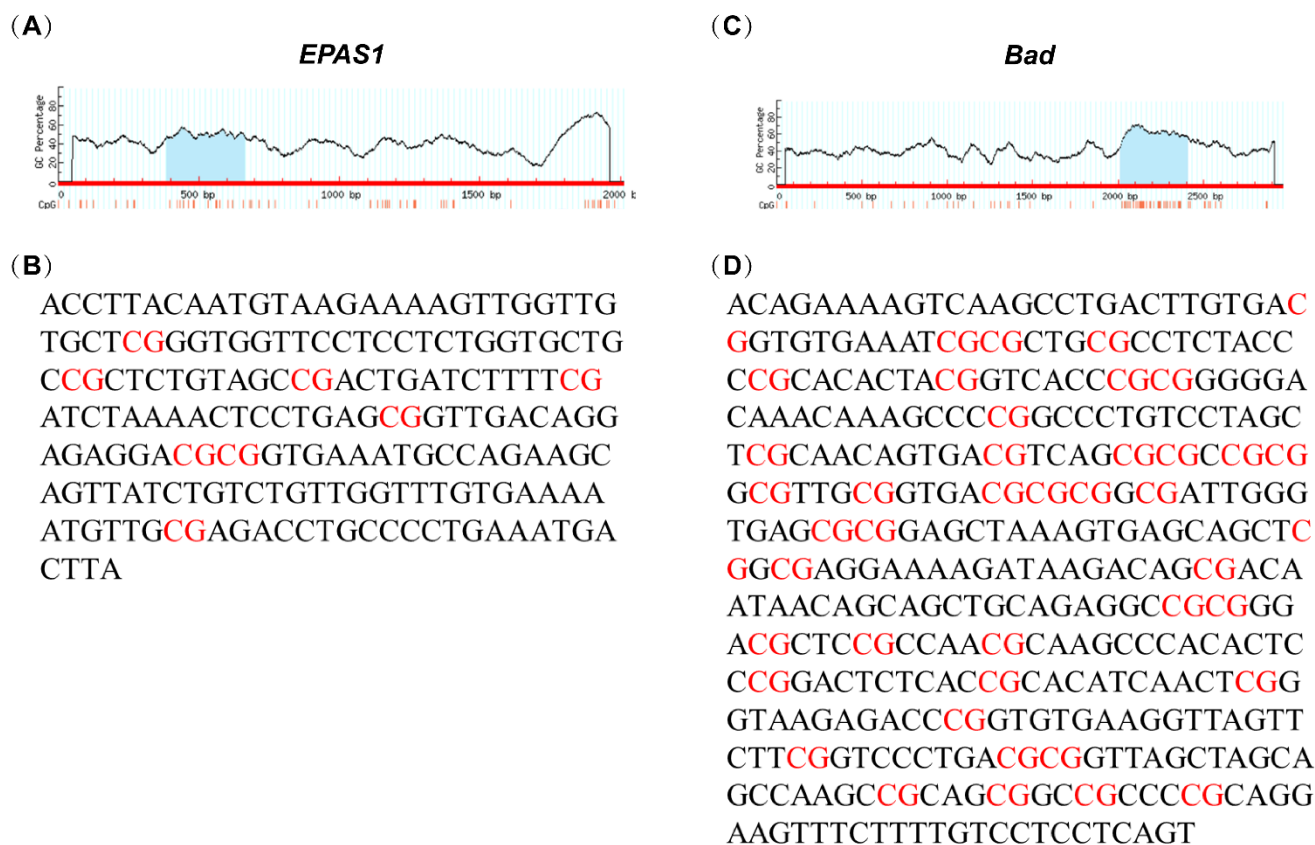

(A) The methylation status measuring region of the *EPAS1* gene. The abscissa indicates a part of the *EPAS1* gene; ordinate denotes CG percentage; the blue area shows the CpG island (CG percentage more than 50%, -1626~-1349, 278 bp). (B) The 193 bp sequence of methylation status measurement in the *EPAS1* gene. The 8 CpG dinucleotides are indicated in red letters. (C) The methylation status measuring region of the *Bad* gene. The abscissa indicates a part of the *Bad* gene; ordinate denotes CG percentage; the blue area shows the CpG island (CG percentage more than 50%, -953~-555, 399 bp). (D) The 400 bp sequence of methylation status measurement in the *Bad* gene. The 42 CpG dinucleotides are indicated in red letters.
